# Supplementary material for: Considerable interobserver variation in delineation of pancreatic cancer on 3DCT and 4DCT: a multi-institutional study
Source: PubMed Central journal article supplement (PMC5364627; doi:10.1186/s13014-017-0777-0), 2017-03-23
Supplement: 13014_2017_777_MOESM1_ESM.pdf [file 13014_2017_777_MOESM1_ESM.pdf]

## Additional file 1

### Questionnaire

|                                                                                                                                                                                                                                                       |
|-------------------------------------------------------------------------------------------------------------------------------------------------------------------------------------------------------------------------------------------------------|
| <p>1. <i>How did you experience the delineation of the pancreatic tumor of patient 1 on 3DCT?</i></p> <ul style="list-style-type: none"><li>a. Very Easy</li><li>b. Easy</li><li>c. Moderate</li><li>d. Difficult</li><li>e. Very difficult</li></ul> |
| <p>2. <i>How did you experience the delineation of the pancreatic tumor of patient 2 on 3DCT?</i></p> <ul style="list-style-type: none"><li>a. Very Easy</li><li>b. Easy</li><li>c. Moderate</li><li>d. Difficult</li><li>e. Very difficult</li></ul> |
| <p>3. <i>How did you experience the delineation of the pancreatic tumor of patient 3 on 3DCT?</i></p> <ul style="list-style-type: none"><li>a. Very Easy</li><li>b. Easy</li><li>c. Moderate</li><li>d. Difficult</li><li>e. Very difficult</li></ul> |
| <p>4. <i>How did you experience the delineation of the pancreatic tumor of patient 4 on 3DCT?</i></p> <ul style="list-style-type: none"><li>a. Very Easy</li><li>b. Easy</li><li>c. Moderate</li><li>d. Difficult</li><li>e. Very difficult</li></ul> |
| <p>5. <i>How did you experience the delineation of the pancreatic tumor of patient 5 on 4DCT?</i></p> <ul style="list-style-type: none"><li>a. Very Easy</li><li>b. Easy</li><li>c. Moderate</li><li>d. Difficult</li><li>e. Very difficult</li></ul> |
| <p>6. <i>How did you experience the delineation of the pancreatic tumor of patient 6 on 4DCT?</i></p> <ul style="list-style-type: none"><li>a. Very Easy</li><li>b. Easy</li><li>c. Moderate</li><li>d. Difficult</li><li>e. Very difficult</li></ul> |
| <p>7. <i>How did you experience the delineation of the pancreatic tumor of patient 7</i></p>                                                                                                                                                          |

*on 4DCT?*

- a. Very Easy
- b. Easy
- c. Moderate
- d. Difficult
- e. Very difficult

*8. How did you experience the delineation of the pancreatic tumor of patient 8 on 4DCT?*

- a. Very Easy
- b. Easy
- c. Moderate
- d. Difficult
- e. Very difficult

*9. How many years' experience do you have in delineation pancreatic tumors for radiotherapy?*

*10. How many patients with pancreatic tumors do you treat per year?*

*11. Have you treated patients within the PREOPANC study?*
