# Supplementary material for: Considerable interobserver variation in delineation of pancreatic cancer on 3DCT and 4DCT: a multi-institutional study
Source: PubMed Central journal article supplement (PMC5364627; doi:10.1186/s13014-017-0777-0), 2017-03-23
Supplement: 13014_2017_777_MOESM3_ESM.pdf [file 13014_2017_777_MOESM3_ESM.pdf]

### Additional file 3

#### Suspicious pathological lymph nodes, stents, and fiducials

**Table e2.** Number of observers who included the suspicious pathological lymph nodes in the (i)GTV according the diagnostic CT report.

| Patient | Location suspicious pathological lymph node | GTV | iGTV |
|---------|---------------------------------------------|-----|------|
| 2       | Portocaval                                  | 5   | 4    |
| 2       | Along common hepatic artery                 | 3   | 2    |
| 4       | Along tumor, not characterized              | 2   | 2    |

**Table e3.** Number of observers who included the biliary stent or percutaneous biliary drainage in the (i)GTV at least 50% of the stent in at least three slices

| Patient | GTV-CT | iGTV-CT |
|---------|--------|---------|
| 1       | 3      | 5       |
| 2       | 2      | 1       |
| 3       | 6      | 4       |
| 4       | 8      | 7       |

**Table e4.** The number of (i)GTV including the fiducial over the number of fiducials multiplied by number of observers ( $3 \times 8 = 24$ ). Partly included fiducials were counted as delineated.

| Patient | GTV-CT        | iGTV-CT       |
|---------|---------------|---------------|
| 1       | 24/24 (100 %) | 23/24 (100 %) |
| 2*      | 5/24 (21 %)   | 4/24 (17 %)   |
| 3       | 22/24 (92 %)  | 16/24 (67 %)  |
| 4       | 24/24 (100 %) | 21/24 (88 %)  |

\* In patient 2, the fiducials were mistakenly not implanted in the tumor
